# Supplementary material for: Limitations of Tamoxifen Application for In Vivo Genome Editing Using Cre/ERT2 System
Source: MDPI journal article supplement (doi:10.3390/ijms232214077), 2022-11-15
Supplement: s1 [file s1]

# Supplementary Materials

**Table S1.** Averaged substance concentrations and their standard deviations after administration of a single 3 mg dose.

| Organ  | Time | Administ-<br>ration | Tam,<br>ng/g | Endo,<br>ng/g | OH-Tam,<br>ng/g | Tam range               | Endo<br>range           | OH-Tam<br>range        |
|--------|------|---------------------|--------------|---------------|-----------------|-------------------------|-------------------------|------------------------|
| uterus | 4    | fed                 | 2108.57      | 28.20         | 924.40          | 1350.38-<br>3346.81     | 19.51-43.5              | 600.07-<br>1547.04     |
| uterus | 4    | injected            | 486637.8     | 743.15        | 11898.46        | 383741.86-<br>605256.33 | 428.94-<br>1034.67      | 10850.04-<br>12670.11  |
| uterus | 17   | fed                 | 1300.33      | 56.40         | 415.30          | 175.87-<br>2356.26      | 15.82-<br>85.46         | 0-952.97               |
| uterus | 17   | injected            | 215627.4     | 5038.46       | 47908.45        | 26964.14-<br>404290.66  | 2668.78-<br>7408.15     | 5453.83-<br>90363.07   |
| liver  | 4    | fed                 | 5371.96      | 242.81        | 4786.52         | 1764.08-<br>10636.76    | 80.56-<br>332.87        | 1855.68-<br>7989.26    |
| liver  | 4    | injected            | 409681.3     | 5054.06       | 50652.93        | 186070.36-<br>699973.62 | 2455.38-<br>6829.67     | 21140.02-<br>74729.23  |
| liver  | 17   | fed                 | 3632.36      | 318.17        | 2322.52         | 2942.09-<br>4065.07     | 154.84-<br>431.26       | 1534.04-<br>3459.56    |
| liver  | 17   | injected            | 26265.46     | 2810.80       | 12759.49        | 1428.31-<br>40136.75    | 436.05-<br>4156.9       | 693.86-<br>19498.02    |
| lung   | 4    | fed                 | 1774.53      | 15981.9       | 20655.34        | 714.49-<br>3116.83      | 6770.92-<br>22200.92    | 7991.96-<br>34301.2    |
| lung   | 4    | injected            | 7037.82      | 219905.1      | 58575.05        | 5833.89-<br>8865.69     | 188612.32-<br>253902.54 | 56313.12-<br>60652.4   |
| lung   | 17   | fed                 | 5656.16      | 17281.81      | 22117.68        | 2080.64-<br>8560.93     | 11222.32-<br>28839.14   | 10131.21-<br>44220     |
| lung   | 17   | injected            | 35605.4      | 214646.1      | 123605.7        | 14988.68-<br>61565.04   | 32013.93-<br>328653.97  | 19529.95-<br>202549.42 |
| brain  | 4    | fed                 | 1258.56      | 8.66          | 936.47          | 838.03-<br>1679.08      | 8.37-8.94               | 758.4-<br>1114.54      |
| brain  | 4    | injected            | 42738.53     | 146.85        | 11622.35        | 26486.17-<br>58704.72   | 95.08-<br>201.36        | 7154.29-<br>13951.3    |
| brain  | 17   | fed                 | 2483.82      | 28.48         | 814.17          | 1719.75-<br>3273.51     | 22.6-32.33              | 399-<br>1292.95        |

|       |    |          |          |        |         |                      |                  |                   |
|-------|----|----------|----------|--------|---------|----------------------|------------------|-------------------|
| brain | 17 | injected | 23625.87 | 183.64 | 6644.77 | 3052.23-<br>41214.27 | 47.22-<br>285.31 | 420.71-<br>9860.4 |
|-------|----|----------|----------|--------|---------|----------------------|------------------|-------------------|

**Table S2.** Primers used for genotyping.

| Primer name | Primer sequence               | Annealing temperature |
|-------------|-------------------------------|-----------------------|
| Cdk8-F      | 5'-CTAATTGGAGTCCTGGACAAGGC-3' | 58°C                  |
| Cdk8-R2     | 5'-AGCGTAGTCTTTATCGTCCTTC-3'  | 58°C                  |
| Cdk8-R      | 5'-CCCATAGAGCCATCTCAACAGC-3'  | 58°C                  |
